# Supplementary material
Source: MDPI journal article supplement (https://www.mdpi.com/2073-4344/13/9/1290)
Supplement: s1 [file s1]

## Supporting Information

# Silver Nanoparticles' Biogenic Synthesis Using *Caralluma subulata* Aqueous Extract and Application for Dye Degradation and Antibacterial Activities

Waleed Mohammed Alamier <sup>1,\*</sup>, Nazim Hasan <sup>1,\*</sup>, Imam Saheb Syed <sup>1</sup>, Ayyob M. Bakry <sup>1</sup>, Khatib Sayeed Ismail <sup>2</sup>, Gangaraju Gedda <sup>3,4</sup> and Wubshet Mekonnen Girma <sup>5</sup>

<sup>1</sup> Department of Chemistry, Faculty of Science, Jazan University, P.O. Box 2097, Jazan 45142, Saudi Arabia; isayed@jazanu.edu.sa (I.S.S.); ayyob1986@gmail.com (A.M.B.)

<sup>2</sup> Department of Biology, Faculty of Science, Jazan University, P.O. Box 2097, Jazan 45142, Saudi Arabia; kismail@jazanu.edu.sa

<sup>3</sup> Department of Chemistry, School of Engineering, Presidency University, Bangalore 560064, Karnataka, India; raju.analy@gmail.com

<sup>4</sup> Department of Animal Science & Technology, BET Research Institute, Chung-Ang University, Anseong 17546, Republic of Korea

<sup>5</sup> Department of Chemistry, College of Natural Science, Wollo University, Dessie P.O. Box 1145, Ethiopia; wubshet.mekonnen@wu.edu.et

\* Correspondence: wmalamier@jazanu.edu.sa (W.M.A.); hhasan@jazanu.edu.sa (N.H.)

**Table S1.** List of phytochemicals identified in aqueous extract of *Caralluma subulata* by Gas Chromatography-Mass spectrometry (GC-MS) along with their retention times, and peak area%, similarity index and molecular weight.

| Peak | R. Time (min) | Peak area % | SI %  | Name of identified phytochemicals from CS                     | Molecular weight (g/mol) |
|------|---------------|-------------|-------|---------------------------------------------------------------|--------------------------|
| 1    | 3.40          | 1.62        | 59.38 | Methyl format                                                 | 60                       |
| 2    | 5.01          | 1.03        | 33.53 | 2,2'-Bioxirane                                                | 86                       |
| 3    | 6.80          | 1.18        | 46.46 | 3-Furaldehyde                                                 | 96                       |
| 4    | 10.74         | 0.94        | 86.16 | 2-Furancarboxaldehyde-5-methyl                                | 110                      |
| 5    | 10.84         | 3.05        | 60.51 | 2,4-Dihydroxy-2,5-dimethyl-3(2H)-furan-3-one                  | 144                      |
| 6    | 12.07         | 3.68        | 29.22 | 5-Hexen-3-ol, 2,2,4-trimethyl-                                | 142                      |
| 7    | 13.14         | 3.43        | 29.80 | 5-Hydroxy-2,2-dimethylhexan-3-one                             | 144                      |
| 8    | 14.81         | 1.76        | 30.01 | cis-2-Ethyl-2-hexen-1-ol                                      | 128                      |
| 9    | 16.08         | 11.40       | 18.31 | 2,4,6-Cycloheptatriene-1-carbonitrile                         | 117                      |
| 10   | 16.88         | 16.47       | 89.27 | 4H-Pyran-4-one, 2,3-dihydro-3,5-dihydroxy-6-methyl            | 144                      |
| 11   | 20.03         | 42.10       | 88.61 | 2-Furancarboxaldehyde, 5-(hydroxymethyl)                      | 126                      |
| 12   | 30.74         | 0.99        | 15.85 | -Methyl-Z-tetradecen-1-ol acetate                             | 268                      |
| 13   | 32.35         | 1.15        | 6.94  | 17-Octadecynoic acid                                          | 280                      |
| 14   | 32.49         | 1.64        | 6.27  | [1,1'-Bicyclopropyl]-2-octanoic acid, 2'-hexyl-, methyl ester | 322                      |

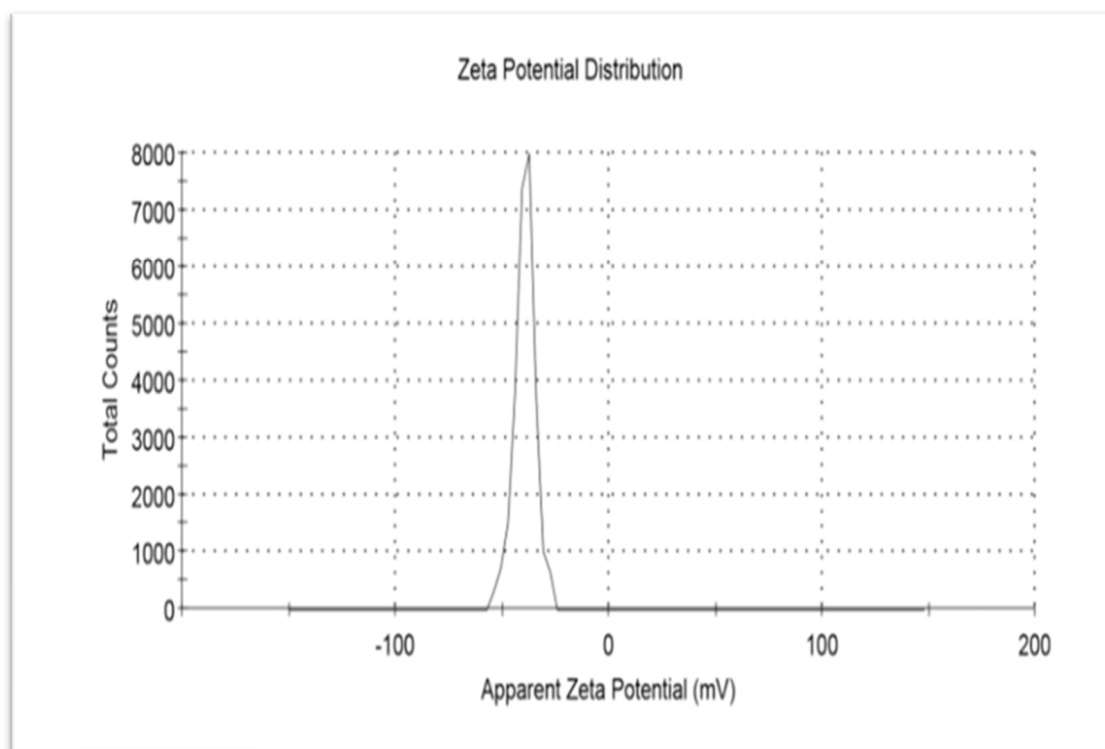

**Figure S1.** Zeta potential of Ag-CS NPs.

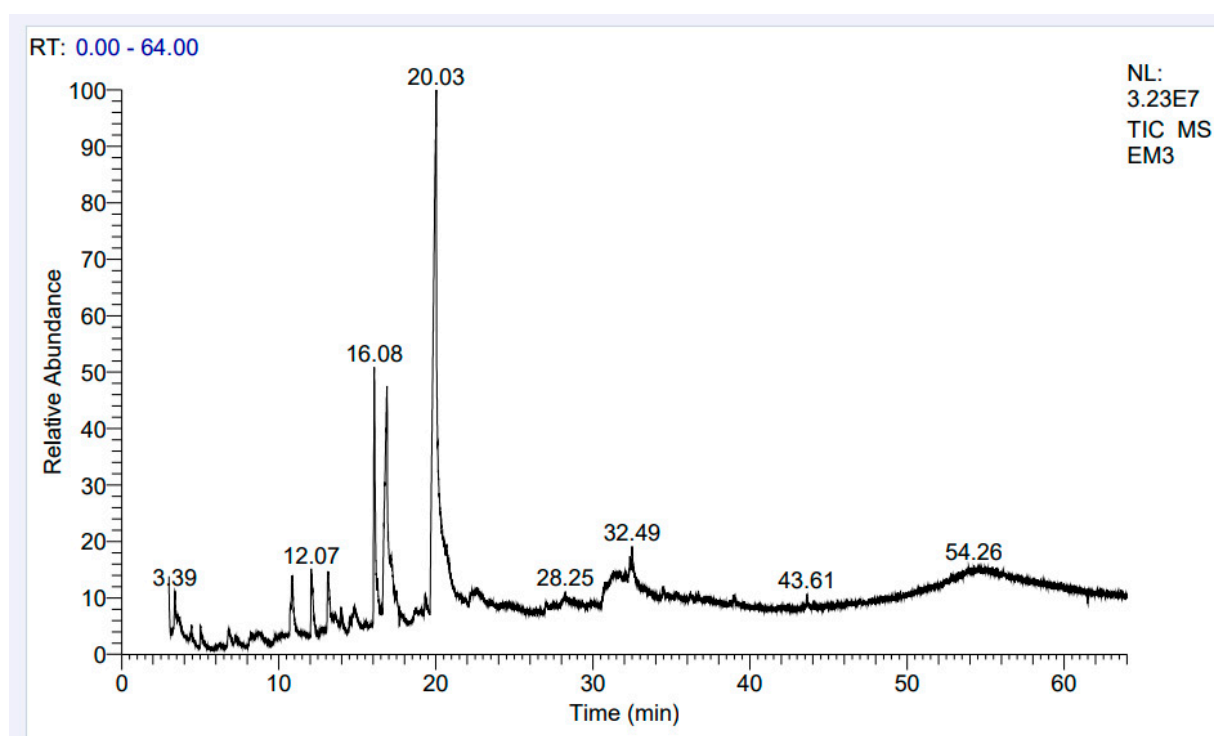

**Figure S2.** Gas Chromatography-Mass Spectrometry (GC-MS) chromatogram of aqueous extract of *Caralluma subulata*. Bioactive compounds in the extract are shown in Table S1.

**Table S2.** XRD different peaks-based Crystallinity calculation.

| S. No | 2 $\theta$ (Degree) | FWHM    | Crystallinity (nm) | Average Crystallinity (nm) |
|-------|---------------------|---------|--------------------|----------------------------|
| 1     | 32.58               | 0.55277 | 15.64              | 22.93                      |
| 2     | 55.10               | 0.38501 | 24.31              |                            |
| 3     | 67.84               | 0.17612 | 56.75              |                            |
| 4     | 38.40               | 1.36446 | 6.44               |                            |
| 5     | 44.76               | 0.57633 | 15.68              |                            |
| 6     | 64.74               | 0.43841 | 22.43              |                            |
| 7     | 77.02               | 1.07445 | 9.89               |                            |

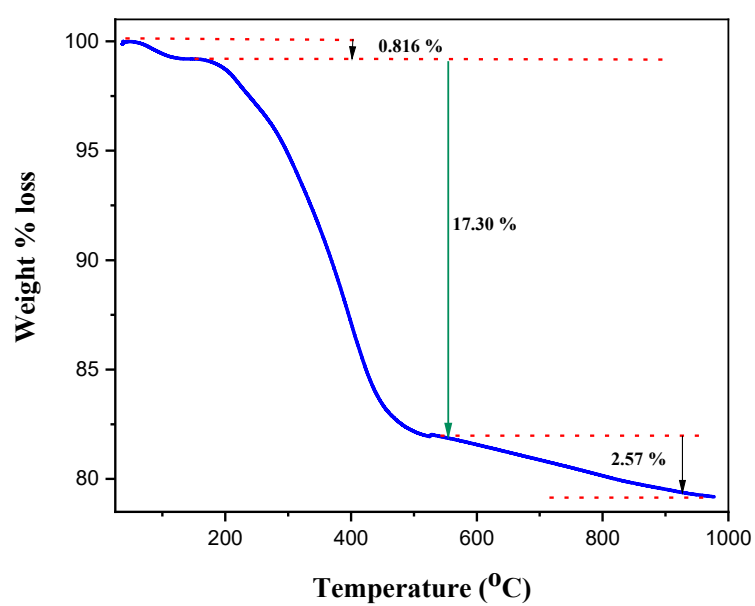

Figure S3. Thermogravimetric analysis (TGA) of Ag-CS NPs.

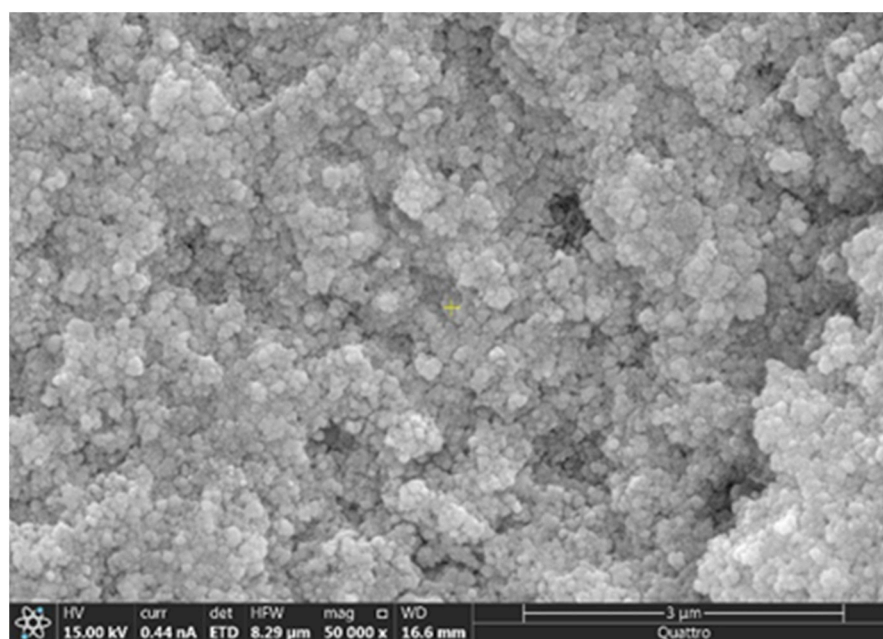

Figure S4. SEM images of Ag-CS NPs after application MB dye reduction using NaBH<sub>4</sub>.

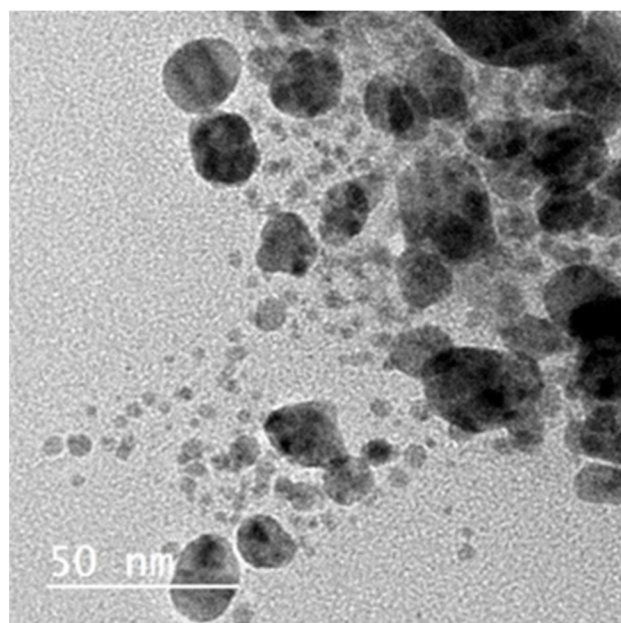

**Figure S5.** TEM images of Ag-CS NPs after application MB dye reduction using  $\text{NaBH}_4$ .
